# Supplementary material
Source: PubMed Central journal article supplement (PMC7543242)
Supplement: ONCO-25-e1552-s002.pdf [file ONCO-25-e1552-s002.pdf]

Supplemental Tables for:

Novel Models Predict Postsurgical Recurrence and Overall Survival for Patients with HBV-related Solitary Hepatocellular Carcinoma  $\leq 10$  cm and without Portal Venous Tumor Thrombus

Shao-Qiang Li et al.

Supplementary Table 1. Risk factors associated with RFS and OS identified by Cox univariable analysis in the derivation cohort (n=811)

| Variables                            | RFS                 |           | OS                  |           |
|--------------------------------------|---------------------|-----------|---------------------|-----------|
|                                      | HR (95% CI)         | P         | HR (95% CI)         | P         |
| Age (year)                           |                     |           |                     |           |
| $\leq 50$ vs $>50$                   | 0.875 (0.715-1.071) | 0.196     | 0.992 (0.758-1.297) | 0.951     |
| Sex                                  |                     |           |                     |           |
| Male vs female                       | 0.965 (0.729-1.277) | 0.803     | 1.030 (0.707-1.500) | 0.879     |
| Anti-viral therapy                   |                     |           |                     |           |
| No vs Yes                            | 1.002 (0.827-1.215) | 0.983     | 1.130 (0.926-1.378) | 0.229     |
| Cirrhosis                            |                     |           |                     |           |
| Yes vs no                            | 0.990 (0.876-1.119) | 0.872     | 1.065 (0.899-1.262) | 0.467     |
| ALT (units/L)                        |                     |           |                     |           |
| $> 40$ vs $\leq 40$                  | 1.290 (1.052-1.583) | 0.014     | 1.234 (0.942-1.617) | 0.128     |
| Child-Pugh score                     |                     |           |                     |           |
| Score 6 + 7 vs Score 5               | 1.190 (0.930-1.523) | 0.166     | 1.462 (1.091-1.960) | 0.011     |
| ALBI grade                           |                     |           |                     |           |
| Grade 2+3 vs Grade 1                 | 1.424 (1.112-1.823) | 0.005     | 1.648 (1.192-2.277) | 0.002     |
| Platelet ( $\times 10^9/L$ )         |                     |           |                     |           |
| $< 100$ vs $\geq 100$                | 0.759 (0.541-1.067) | 0.112     | 0.648 (0.404-1.039) | 0.072     |
| NLR                                  |                     |           |                     |           |
| $> 2.3$ vs $\leq 2.3$                | 1.382 (1.126-1.696) | 0.002     |                     |           |
| $> 2.62$ vs $\leq 2.62$              |                     |           | 1.638 (1.243-2.158) | $< 0.001$ |
| PLR                                  |                     |           |                     |           |
| $> 108.3$ vs $\leq 108.3$            | 1.297 (1.058-1.589) | 0.033     |                     |           |
| $> 121.3$ vs $\leq 121.3$            |                     |           | 1.002 (1.001-1.003) | 0.006     |
| Tumor size (cm)                      | 1.077 (1.049-1.105) | $< 0.001$ | 1.549 (1.293-1.854) | $< 0.001$ |
| AFP ( $\mu g/L$ )                    |                     |           |                     |           |
| $> 400$ vs $\leq 400$                | 1.274 (1.133-1.433) | $< 0.001$ | 1.279 (1.094-1.495) | 0.002     |
| Tumor capsule                        |                     |           |                     |           |
| Incomplete + non-capsule vs Complete | 1.305 (0.976-1.745) | 0.073     | 1.262 (0.858-1.857) | 0.237     |
| MVI                                  |                     |           |                     |           |
| Yes vs No                            | 2.248 (1.796-2.813) | $< 0.001$ | 2.379 (1.787-3.167) | $< 0.001$ |
| Tumor differentiation†               |                     |           |                     |           |
| Level 3 vs level 1+ level 2          | 1.460 (1.176-1.812) | 0.001     | 1.749 (1.325-2.310) | $< 0.001$ |
| Extent of resection                  |                     |           |                     |           |
| Major vs Minor                       | 0.883 (0.715-1.092) | 0.252     | 0.977 (0.736-1.298) | 0.875     |
| Type of resection                    |                     |           |                     |           |
| Anatomic vs Non-anatomic             | 0.893 (0.721-1.107) | 0.303     | 0.951 (0.714-1.266) | 0.730     |
| Resection margin                     |                     |           |                     |           |
| $\leq 1$ cm vs $> 1$ cm              | 0.875 (0.701-1.108) | 0.532     | 0.651 (0.539-1.024) | 0.247     |

|                   |                     |        |                     |        |
|-------------------|---------------------|--------|---------------------|--------|
| Blood loss (ml)   |                     |        |                     |        |
| >800 vs ≤800      | 1.450 (1.048-2.005) | 0.025  | 1.757 (1.159-2.663) | 0.008  |
| Blood transfusion |                     |        |                     |        |
| Yes vs No         | 1.687 (1.346-2.115) | <0.001 | 1.815 (1.357-2.426) | <0.001 |

† level 1, High + High-moderate; level 2, Moderate-low; level 3, Low+Undifferentiation. HBsAg indicates hepatitis B surface antigen; ALT, alanine transaminase; NLR, neutrophil to lymphocyte ratio; PLR, platelet to lymphocyte ratio; AFP, alpha fetoprotein; MVI, microscopic vascular invasion.

Supplementary Table 2. Comparison of C-index of our nomograms with the 6 conventional staging systems

| Model        | RFS-prediction   |          | OS-prediction    |          |
|--------------|------------------|----------|------------------|----------|
|              | C-index (95% CI) | P value* | C-index (95% CI) | P value* |
| BCLC         | 0.55 (0.53-0.57) | <0.001   | 0.58 (0.58-0.60) | <0.001   |
| TNM          | 0.73 (0.71-0.75) | <0.01    | 0.74 (0.72-0.76) | <0.001   |
| JIS          | 0.74 (0.72-0.76) | <0.001   | 0.76 (0.73-0.78) | <0.001   |
| CLIP         | 0.62 (0.58-0.64) | <0.001   | 0.68 (0.62-0.70) | <0.01    |
| CUPI         | 0.61 (0.59-0.63) | <0.001   | 0.67 (0.65-0.69) | <0.001   |
| Okuda        | 0.54 (0.52-0.56) | <0.001   | 0.56 (0.54-0.59) | <0.001   |
| Our nomogram | 0.83 (0.79-0.87) |          | 0.87 (0.83-0.91) |          |

\*Compared to our nomogram
